# Supplementary material for: Mesoporous silica nanospheres decorated with CdS nanocrystals for enhanced photocatalytic and excellent antibacterial activities
Source: Royal Society of Chemistry journal article supplement (doi:10.1039/c3nr01329d), 2013-01-01
Supplement: c3nr01329d.pdf [file c3nr01329d.pdf]

## Supporting information

# Mesoporous Silica Nanospheres Decorated with CdS Nanocrystals for Enhanced Photocatalytic and Excellent Antibacterial Activities

Jin-Lin Hu<sup>a</sup>, Qi-Hao Yang<sup>a</sup>, He Lin<sup>a</sup>, Yu-Pei Ye<sup>a</sup>, Qiao He<sup>a</sup>, Jie-Ni Zhang<sup>a</sup>, Hai-Sheng Qian<sup>\*.b</sup>

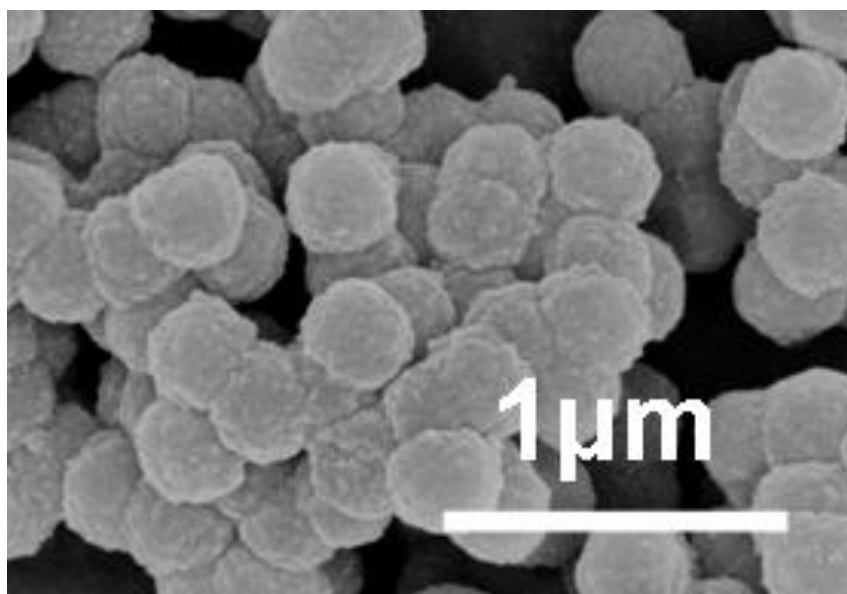

**Fig. S1** SEM image of silica composite nanospheres obtained from 1000 μL tetraethyl orthosilicate (TEOS) and 400 μL octadecyltrimethoxysilane (C18TMS) at room temperature for 24 hours.

**Table S1** Element composition of the as-prepared SiO<sub>2</sub>/CdS mesoporous nanospheres from EDX analyses.

| Element       | Weight% | Atomic% |
|---------------|---------|---------|
| O             | 27.40   | 51.90   |
| Si            | 23.50   | 25.40   |
| S             | 0.090   | 0.090   |
| Cd            | 05.60   | 01.50   |
| Cu            | 42.50   | 20.30   |
| Totals 100.00 |         |         |

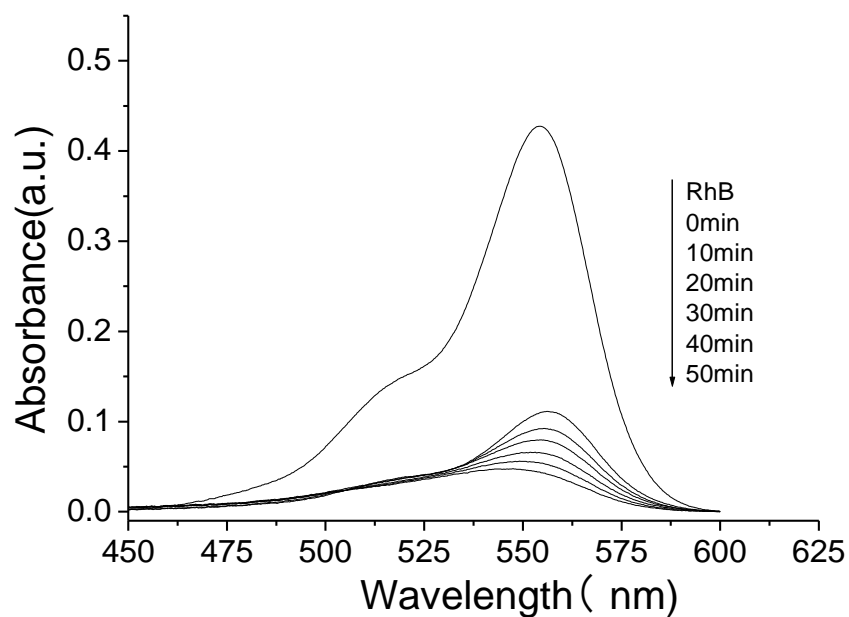

**Fig. S2** UV-vis spectra showing photodecomposition of RhB dye in solution (3.0 mg/L) over the SiO<sub>2</sub>@CdS mesoporous nanospheres (40 mg) obtained from 0.2 mmol cadmium acetate ( Cd(Ac)<sub>2</sub>·2H<sub>2</sub>O ) and 0.4 mmol thiourea via the process represented in Fig. 1 under visible light irradiation.

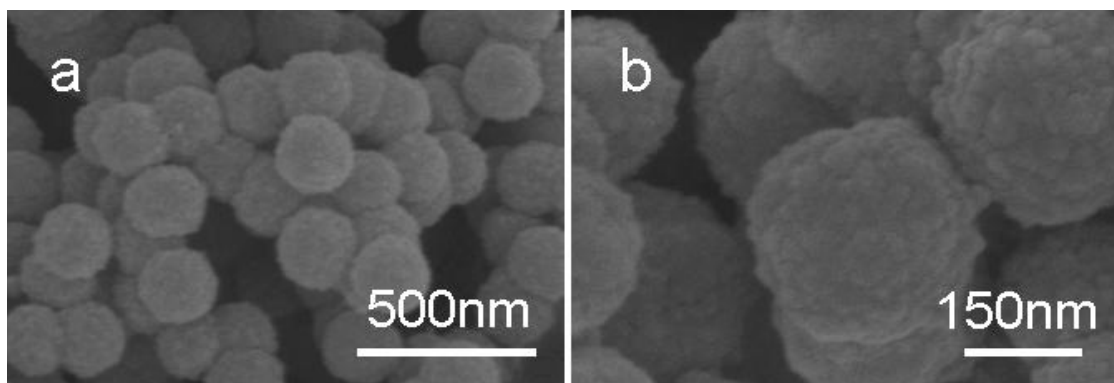

**Fig. S3** FESEM images of the mesoporous SiO<sub>2</sub>@CdS nanospheres obtained from 0.6 mmol cadmium acetate (Cd(Ac)<sub>2</sub>·2H<sub>2</sub>O) and 1.2 mmol thiourea via the process represented in Fig. 1 (a) A general view of the mesoporous SiO<sub>2</sub>@CdS nanospheres; (b) A magnified SEM image of the nanospheres.

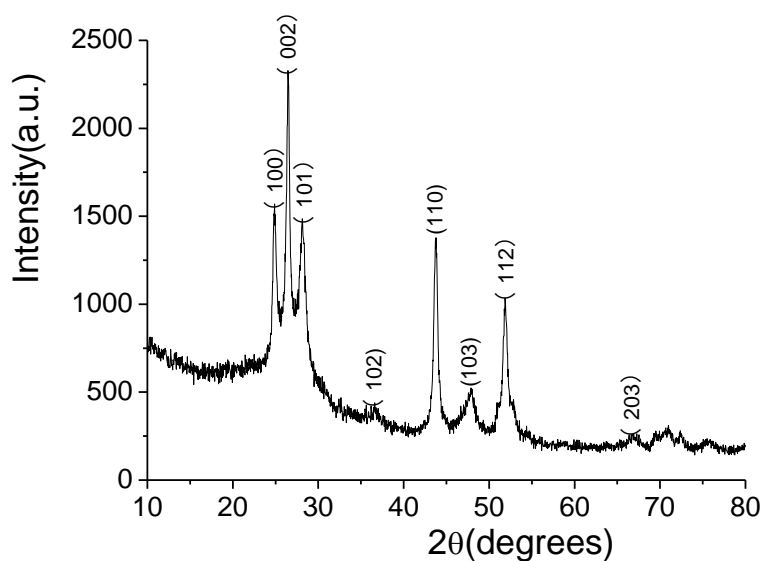

**Fig. S4** XRD pattern of the as-prepared sample obtained from the reaction of 0.6 mmol cadmium acetate and 1.2 mmol thiourea according to the same protocol.
